# Supplementary material for: Spatial coefficient of variation in pseudo-continuous arterial spin labeling cerebral blood flow images as a hemodynamic measure for cerebrovascular steno-occlusive disease: A comparative 15O positron emission tomography study
Source: PubMed Central journal article supplement — J Cereb Blood Flow Metab. 2018 Jun 5;39(1):173–81. doi: 10.1177/0271678X18781667 (PMC6311663; doi:10.1177/0271678x18781667), 2018-06-05
Supplement: Supplemental_material.pdf [file Supplemental_material.pdf]

Supplemental Table: Results for each patient.

| No.  | Diagnosis         | PET                |             |                |             |               |             |               |             |               |             | PASL                             |             | pCASL         |             |                    |             |                 |             |
|------|-------------------|--------------------|-------------|----------------|-------------|---------------|-------------|---------------|-------------|---------------|-------------|----------------------------------|-------------|---------------|-------------|--------------------|-------------|-----------------|-------------|
|      |                   | CBF (mL/ 100g/min) |             | CBV (mL/ 100g) |             | MTT (sec)     |             | VR (%)        |             | OEF (%)       |             | CMRO <sub>2</sub> (mL/ 100g/min) |             | ATT (msec)    |             | CBF (mL/ 100g/min) |             | Spatial CoV (%) |             |
|      |                   | Contralateral      | Ipsilateral | Contralateral  | Ipsilateral | Contralateral | Ipsilateral | Contralateral | Ipsilateral | Contralateral | Ipsilateral | Contralateral                    | Ipsilateral | Contralateral | Ipsilateral | Contralateral      | Ipsilateral | Contralateral   | Ipsilateral |
| 1    | Rt. ICA occlusion | 39.5               | 28.3        | 2.61           | 3.17        | 3.96          | 6.72        | 3.2           | 6.2         | 47.8          | 47.6        | 2.93                             | 2.11        | 858           | 1286        | 43.4               | 37.3        | 26.1            | 48.3        |
| 2    | Rt. MCA occlusion | 41.1               | 33.1        | 3.10           | 3.17        | 4.53          | 5.73        | 26.4          | 24.2        | 36.8          | 35.0        | 2.81                             | 2.22        | 1258          | 1322        | 39.9               | 30.3        | 30.4            | 51.4        |
| 3    | Rt. MCA occlusion | 46.4               | 38.7        | 3.38           | 4.15        | 4.37          | 6.43        | 21.5          | 16.0        | 44.0          | 48.2        | 3.30                             | 3.03        | 1080          | 1486        | 40.9               | 30.0        | 25.0            | 55.9        |
| 4    | Rt. MCA stenosis  | 42.3               | 44.4        | 3.59           | 4.48        | 5.09          | 6.05        | 43.1          | 19.2        | 43.9          | 42.6        | 3.16                             | 3.22        | 938           | 1080        | 44.3               | 46.0        | 32.3            | 38.8        |
| 5    | Rt. ICA stenosis  | 59.3               | 53.0        | 3.29           | 3.33        | 3.33          | 3.77        | -0.1          | 2.3         | 33.1          | 32.9        | 3.70                             | 3.27        | 992           | 1000        | 42.3               | 41.1        | 27.0            | 31.9        |
| 6    | Lt. ICA occlusion | 45.6               | 40.5        | 2.58           | 2.72        | 3.39          | 4.03        | 22.2          | 16.6        | 39.0          | 41.0        | 3.46                             | 3.22        | 1224          | 1129        | 29.7               | 26.7        | 33.8            | 52.0        |
| 7    | Lt. MCA occlusion | 43.2               | 41.2        | 3.23           | 3.19        | 4.49          | 4.65        | 40.0          | 39.0        | 46.0          | 45.7        | 3.49                             | 3.36        | 1161          | 1646        | 48.6               | 43.8        | 22.5            | 40.0        |
| 8    | Lt. MCA occlusion | 30.2               | 27.8        | 2.89           | 2.67        | 5.73          | 5.76        | 34.7          | 32.8        | 58.1          | 57.8        | 3.51                             | 3.20        | 1101          | 1264        | 42.9               | 43.5        | 25.2            | 26.8        |
| 9    | Rt. MCA stenosis  | 59.2               | 58.2        | 3.35           | 3.53        | 3.39          | 3.64        | 63.6          | 47.5        | 46.6          | 49.6        | 4.66                             | 4.82        | 915           | 1108        | 45.2               | 45.4        | 23.6            | 28.2        |
| 10   | Lt. MCA occlusion | 57.7               | 56.0        | 4.23           | 4.40        | 4.40          | 4.72        | 23.0          | 0.4         | 36.5          | 35.7        | 4.28                             | 4.05        | 931           | 1237        | 45.0               | 47.9        | 25.1            | 33.0        |
| 11   | Rt. ICA occlusion | 54.2               | 48.0        | 3.23           | 3.23        | 3.58          | 4.04        | 46.1          | 29.9        | 41.2          | 44.5        | 3.20                             | 3.05        | 849           | 1461        | 55.2               | 50.8        | 35.0            | 42.3        |
| 12   | Lt. MCA stenosis  | 35.7               | 33.0        | 3.27           | 3.49        | 5.49          | 6.34        | 20.8          | -3.6        | 42.1          | 43.4        | 2.81                             | 2.67        | 1125          | 1189        | 27.7               | 27.5        | 38.1            | 42.9        |
| 13   | Rt. MCA occlusion | 51.2               | 32.8        | 3.51           | 3.59        | 4.11          | 6.57        | -5.1          | -16.1       | 44.2          | 45.0        | 3.88                             | 2.60        | 1089          | 1423        | 42.0               | 36.2        | 28.0            | 58.4        |
| 14   | Rt. ICA occlusion | 36.8               | 35.4        | 3.02           | 3.26        | 4.92          | 5.53        | 28.7          | 23.4        | 52.6          | 52.5        | 3.29                             | 3.15        | 1247          | 1344        | 35.6               | 24.8        | 36.8            | 59.5        |
| 15   | Rt. MCA stenosis  | 52.5               | 50.3        | 3.93           | 3.88        | 4.49          | 4.63        | 37.3          | 33.8        | 45.0          | 44.8        | 3.49                             | 3.32        | 1077          | 1236        | 47.0               | 45.0        | 24.6            | 27.5        |
| 16   | Rt. MCA stenosis  | 40.8               | 33.2        | 3.99           | 4.13        | 5.87          | 7.46        | 17.4          | 20.8        | 46.7          | 53.4        | 2.97                             | 2.75        | 1252          | 1486        | 35.9               | 28.6        | 37.2            | 46.5        |
| 17   | Rt. MCA occlusion | 55.2               | 47.9        | 3.11           | 3.28        | 3.38          | 4.11        | 50.1          | 12.7        | 41.2          | 44.1        | 3.85                             | 3.55        | 906           | 1485        | 43.3               | 47.5        | 27.6            | 34.6        |
| Mean |                   | 46.5               | 41.3        | 3.31           | 3.51        | 4.38          | 5.31        | 27.8          | 17.9        | 43.8          | 44.9        | 3.46                             | 3.15        | 1059          | 1305        | 41.7               | 38.4        | 29.3            | 42.2        |
| SD   |                   | 8.9                | 9.6         | 0.45           | 0.53        | 0.83          | 1.19        | 18.3          | 16.5        | 6.0           | 6.6         | 0.50                             | 0.64        | 142           | 175         | 6.7                | 8.7         | 5.2             | 10.9        |
